# Supplementary material for: Click-based porous organic framework containing chelating terdentate units and its application in hydrogenation of olefins
Source: Royal Society of Chemistry journal article supplement (doi:10.1039/c4ta00145a), 2014-01-01

## Supporting information

*for*

### **Click-based Porous Organic Framework Containing Chelating Terdentate Units and Application in Hydrogenation of Olefins**

Hong Zhong, Yaqiong Gong, Fengsen Zhang, Liuyi Li, and Ruihu Wang\*

#### **Content**

|       |                                                                        |
|-------|------------------------------------------------------------------------|
| S2    | Fig. S1 Solid-state UV-vis spectra of DEP, TAM, BTP-POF and Pd/BTP-POF |
| S2    | Fig. S2 TGA curves for BTP-POF and Pd/BTP-POF.                         |
| S2    | Fig. S3 XRD patterns for BTP-POF and Pd/BTP-POF.                       |
| S3    | Fig. S4 N <sub>2</sub> isotherms of BTP-POF and Pd/BTP-POF at 77 K.    |
| S3    | Fig. S5 H <sub>2</sub> isotherms of BTP-POF and Pd/BTP-POF at 77 K.    |
| S4    | NMR data of starting materials and hydrogenation products              |
| S5-10 | NMR spectra of starting materials and hydrogenation products           |

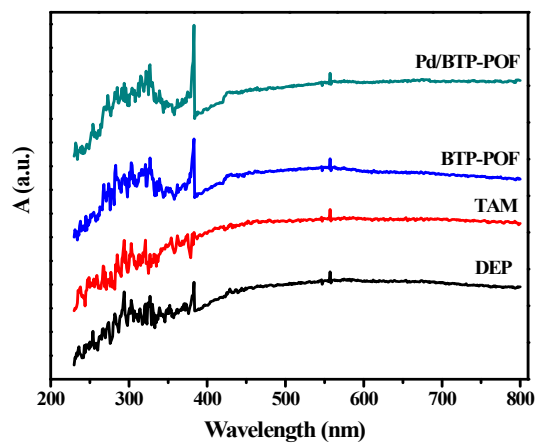

**Fig. S1** Solid-state UV-vis spectra of DEP, TAM, BTP-POF and Pd/BTP-POF

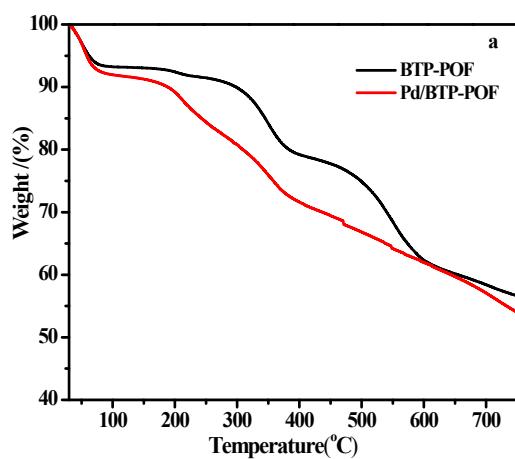

**Fig. S2** TGA curves for BTP-POF and Pd/BTP-POF.

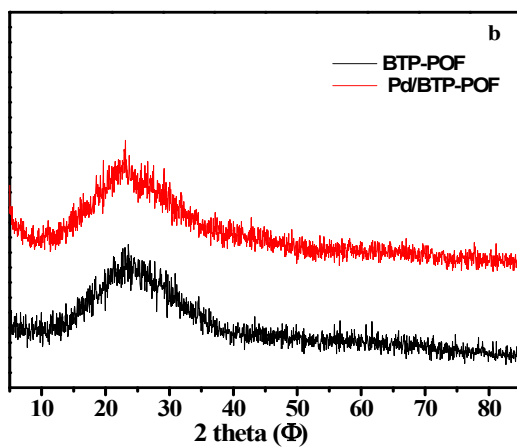

**Fig. S3** XRD patterns for BTP-POF and Pd/BTP-POF.

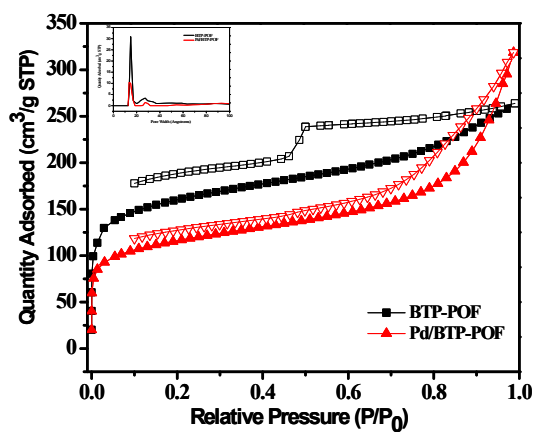

Fig. S4 N<sub>2</sub> isotherms of BTP-POF and Pd/BTP-POF at 77 K, (Inset) Pore size distributions of BTP-POF and Pd/BTP-POF.

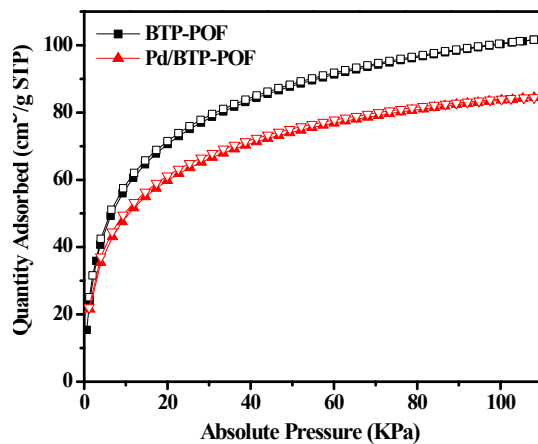

Fig. S5. H<sub>2</sub> isotherms of BTP-POF and Pd/BTP-POF at 77 K.

## NMR data of starting materials and hydrogenation products

**2,6-Diethynylpyridine**<sup>[1]</sup>: <sup>1</sup>H NMR:  $\delta$  7.67 (t,  $J = 7.6$ Hz, 1H), 7.47 (d,  $J = 7.6$ Hz, 1H), 3.18 (s, 2H);  
<sup>13</sup>C NMR:  $\delta$  142.8, 136.5, 127.1, 82.1 ppm.

**Tetrakis(4-azidophenyl)methane**<sup>[2]</sup>: <sup>1</sup>H NMR:  $\delta$  7.15 (d,  $J = 8.7$  Hz, 8H), 6.96 (d,  $J = 8.7$  Hz, 8H);  
<sup>13</sup>C NMR:  $\delta$  142.9, 138.2, 132.1, 118.4, 63.2.

**Hexane**: <sup>1</sup>H NMR:  $\delta$  1.30-1.35 (m, 8H), 0.92 (t,  $J = 7.0$ , 6H); <sup>13</sup>C NMR:  $\delta$  31.6, 22.6, 14.0.

**Octane**: <sup>1</sup>H NMR:  $\delta$  1.31-1.36 (m, 12H), 0.92 (t,  $J = 7.0$ , 6H); <sup>13</sup>C NMR:  $\delta$  31.9, 29.3, 22.7, 14.0.

**Cyclohexane**: <sup>1</sup>H NMR:  $\delta$  1.46 (s, 12H); <sup>13</sup>C NMR:  $\delta$  26.9.

**Ethylbenzene**: <sup>1</sup>H NMR:  $\delta$  7.38-7.42 (m, 2H), 7.27-7.33 (m, 3H), 2.27 (q,  $J = 7.6$ , 2H), 1.37 (t,  $J = 7.6$ , 3H); <sup>13</sup>C NMR:  $\delta$  144.3, 128.4, 127.9, 125.7, 29.0, 15.7.

## References

- (1) S. Leininger, M. Schmitz and P. J. Stang. *Org. Lett.*, 1999, **1**, 1921-1923.
- (2) O. Plietzsch, C. I. Schilling, M. Tolev, M. Nieger, C. Richert, T. Muller and S. Bräse. *Org. Biomol. Chem.*, 2009, **7**, 4734-4743.

# NMR spectra of starting materials and hydrogenation products

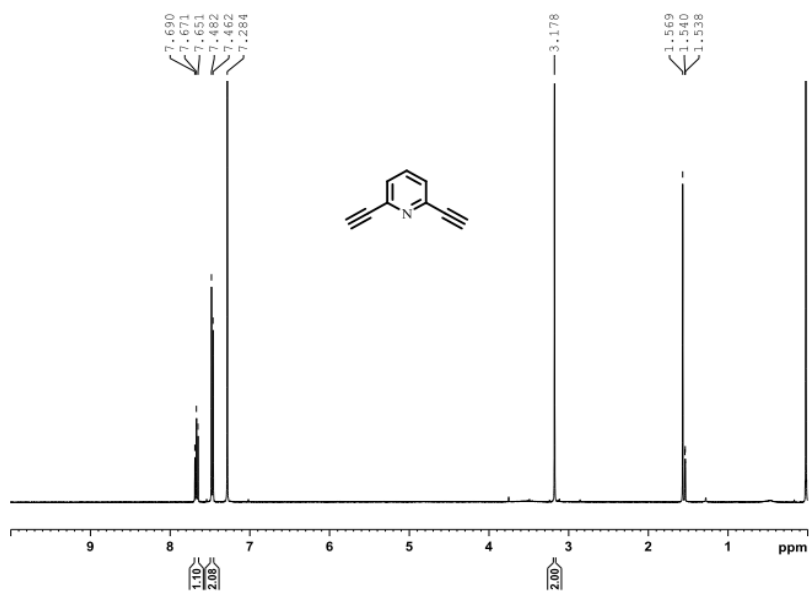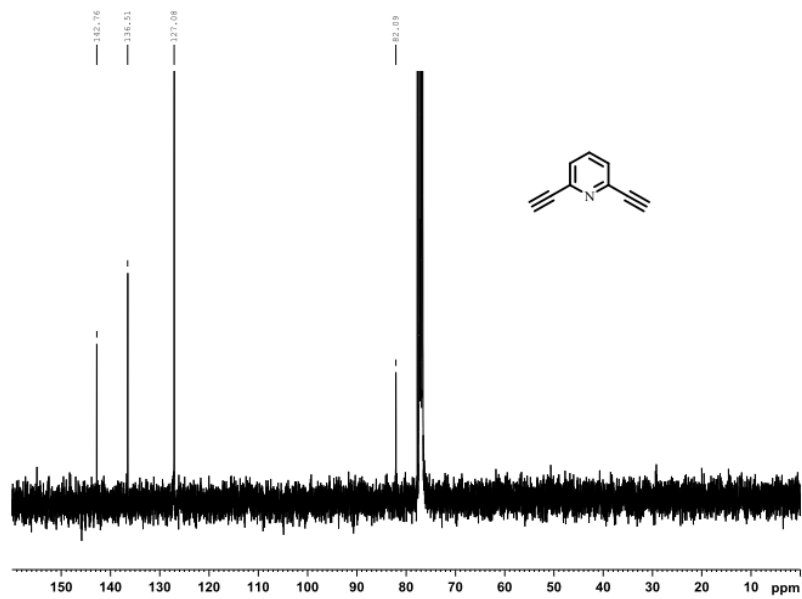

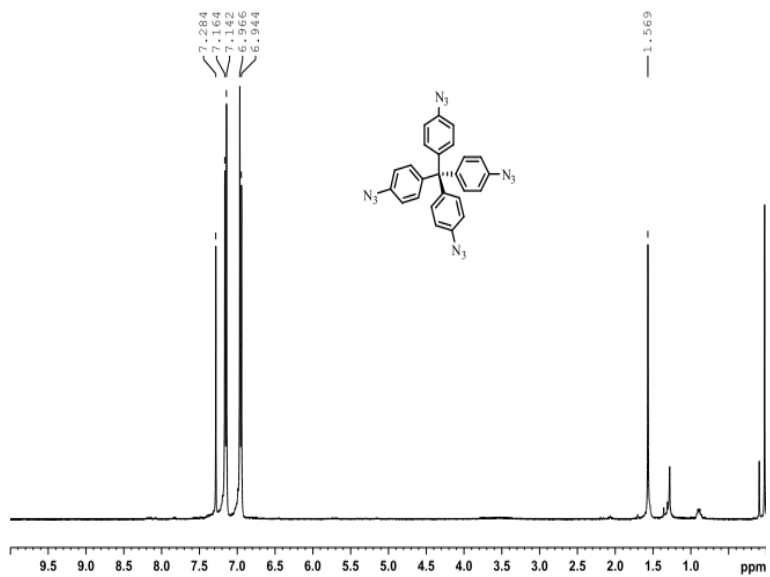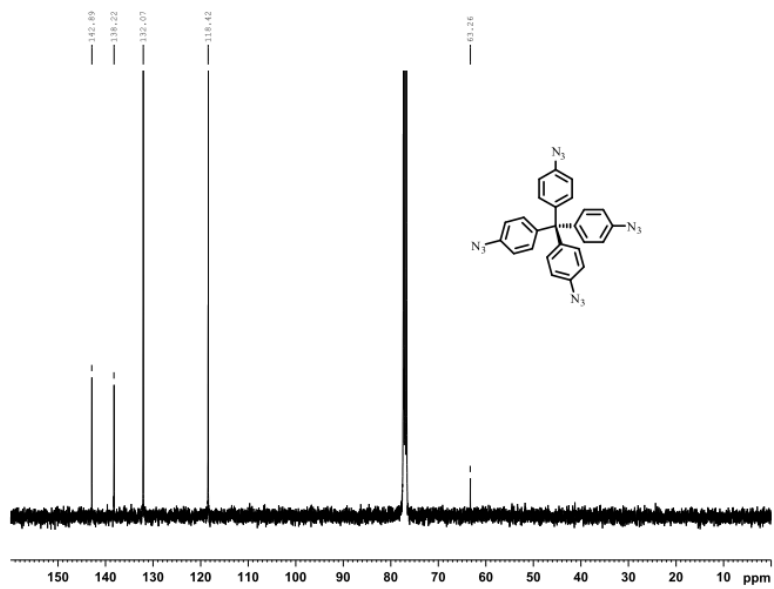

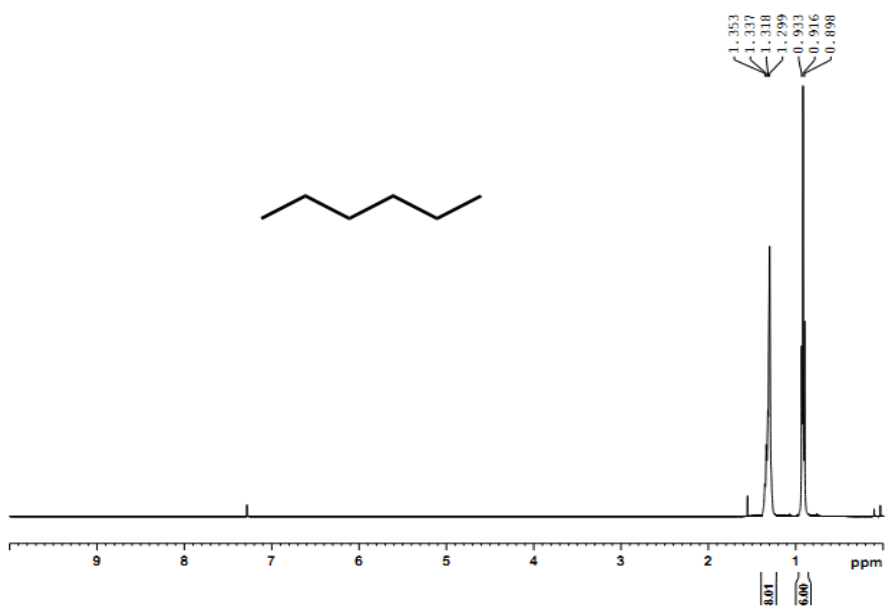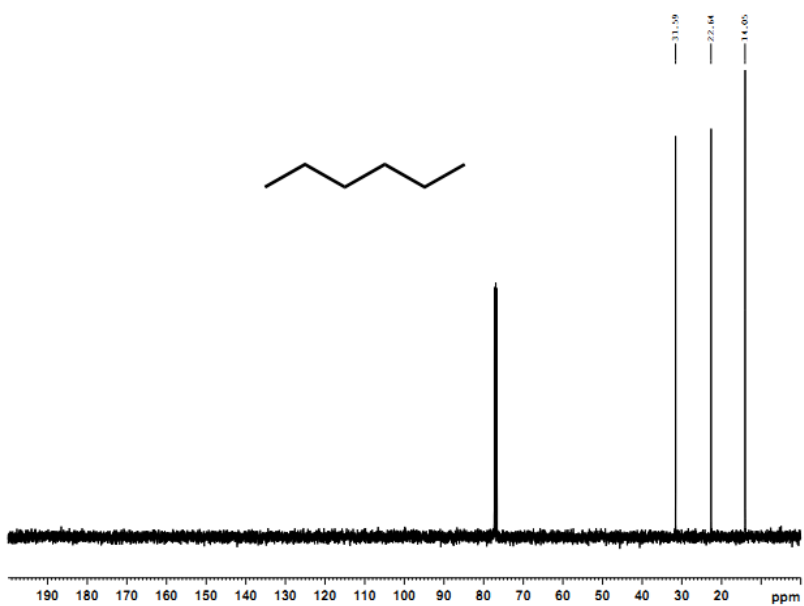

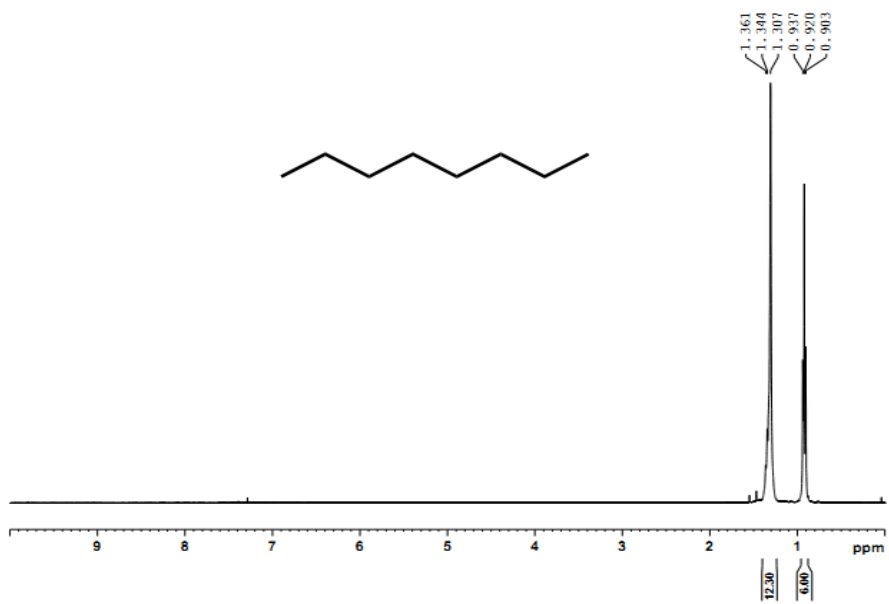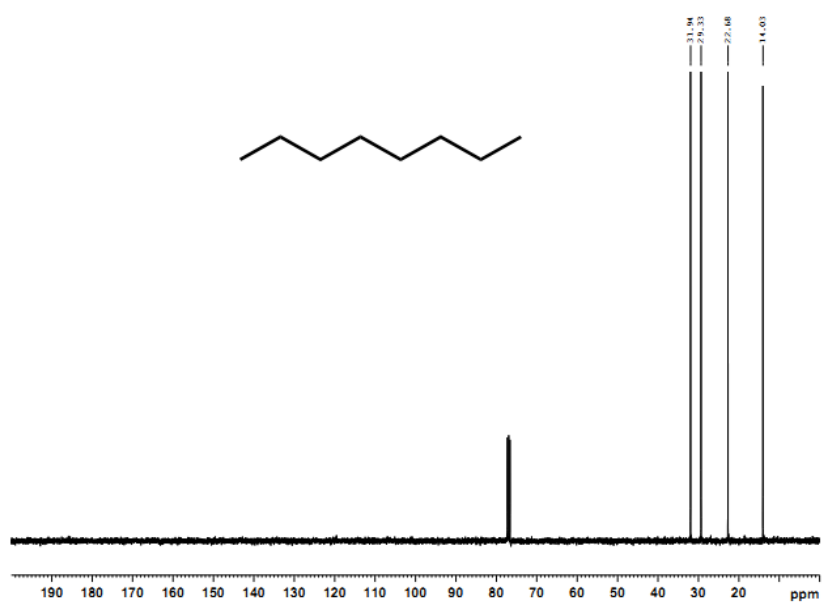



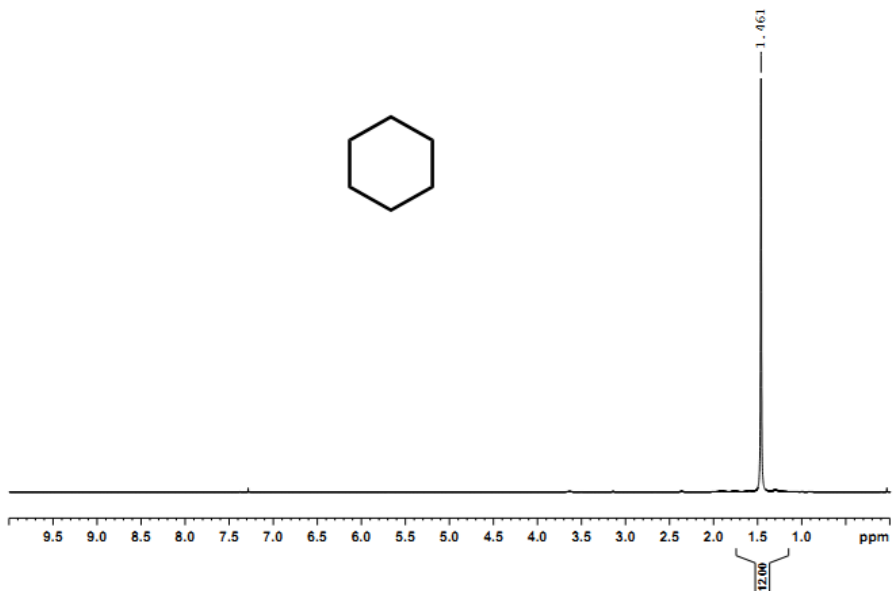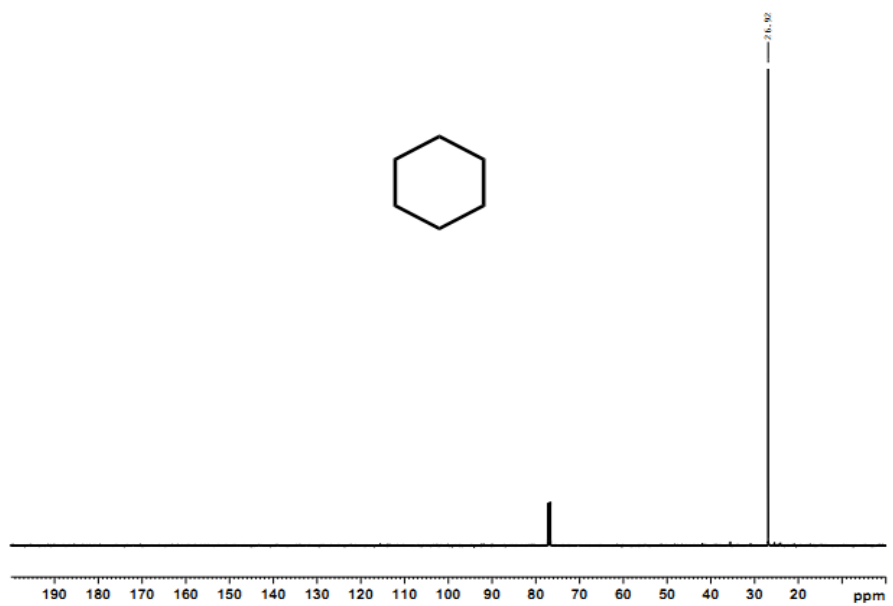

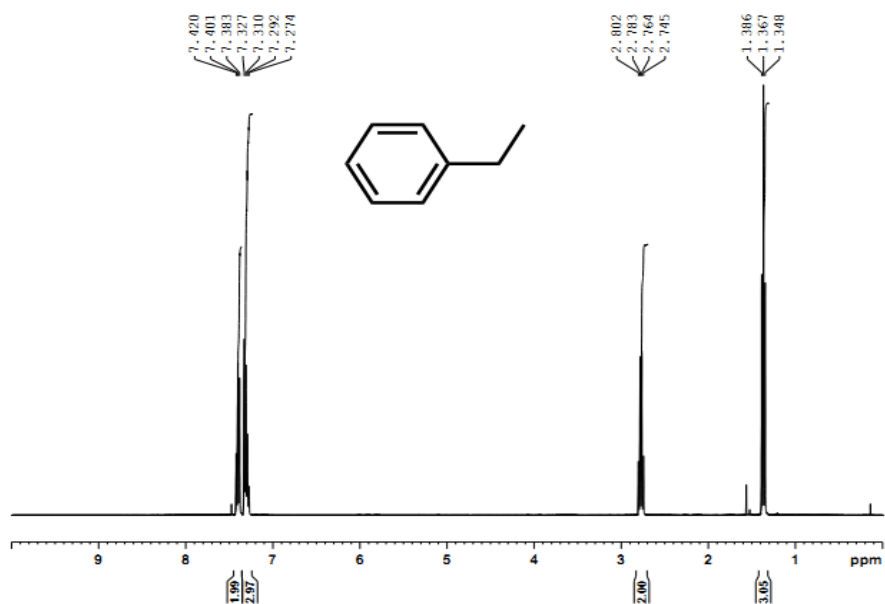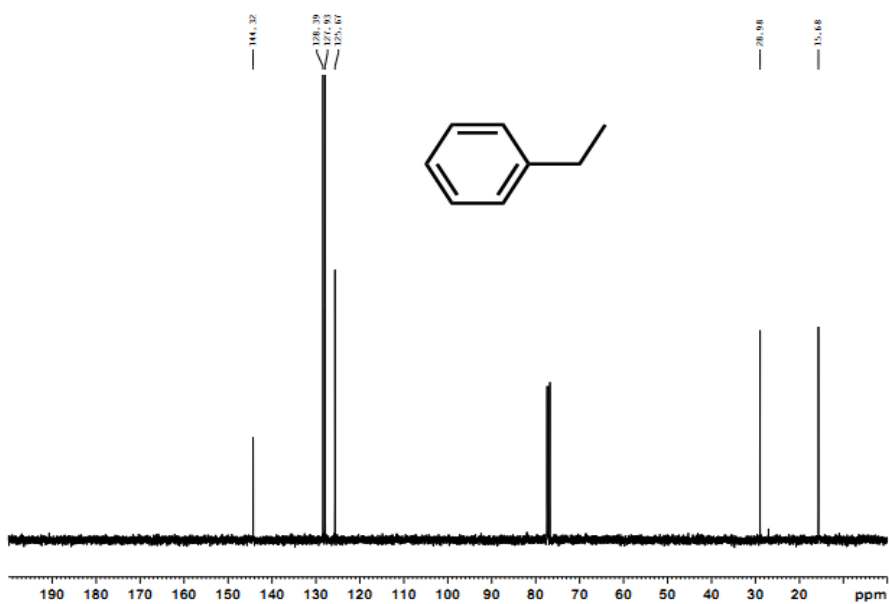

Supplement: c4ta00145a1.pdf [file c4ta00145a1.pdf]
